# Supplementary material for: Creating hierarchically macro-/mesoporous Sn/CeO2for the selective catalytic reduction of NO with NH3
Source: Royal Society of Chemistry journal article supplement (doi:10.1039/c6ra18339e), 2016-01-01
Supplement: c6ra18339e1.pdf [file c6ra18339e1.pdf]

*Electronic Supplementary Information (ESI)*

## **Creating hierarchically macro-/meso-porous Sn/CeO<sub>2</sub> for selective catalytic reduction of NO with NH<sub>3</sub>**

Cheng Fang, Liyi Shi, Hongrui Li, Lei Huang, Jianping Zhang and Dongsong Zhang\*

Research Center of Nano Science and Technology, Shanghai University, Shanghai  
200444, China.

\* Corresponding author: Tel: +86-21-66137152; E-mail: dszhang@shu.edu.cn

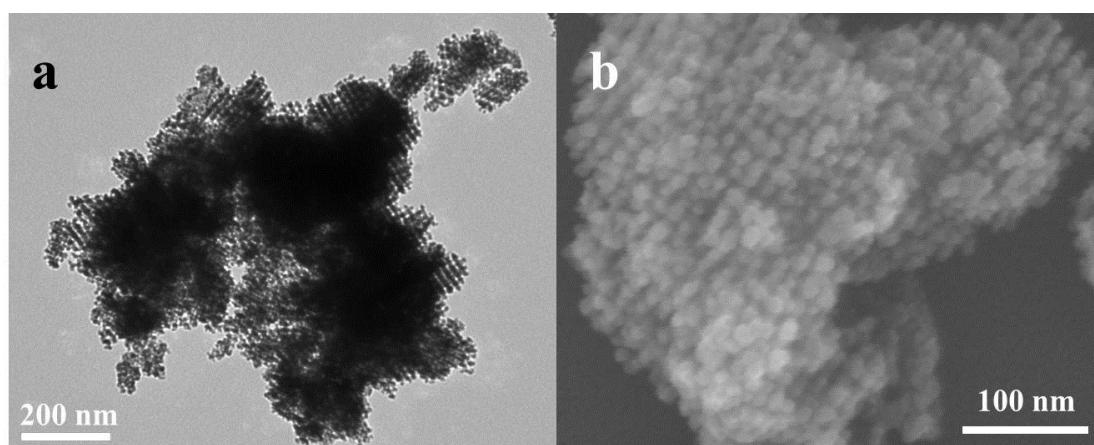

**Fig S1.** (a) TEM and (b) SEM images of the H-CeO<sub>2</sub>.

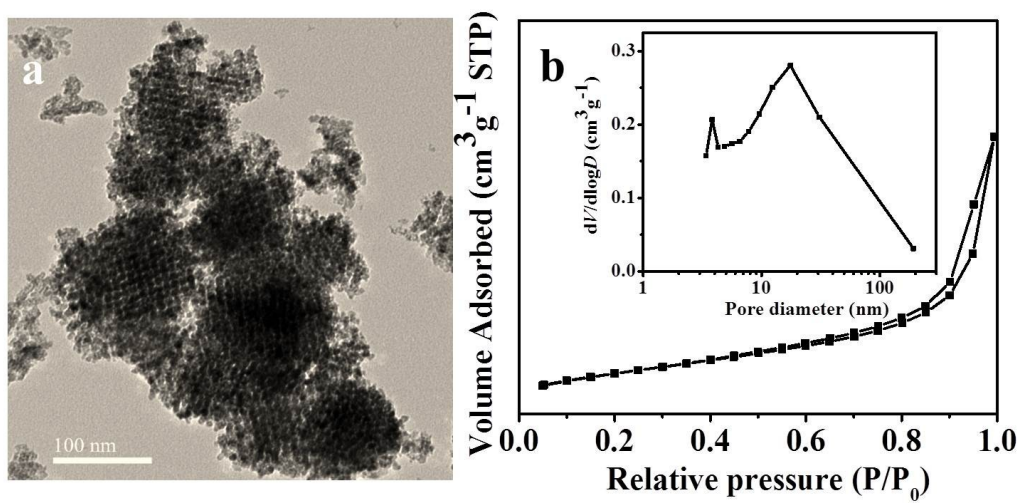

**Fig S2.** (a) TEM image and (b) N<sub>2</sub> adsorption-desorption isotherms and pore size distribution (inset) of the H-Sn/CeO<sub>2</sub> after the stability test.
